# Supplementary material for: Mitogenomic exploration supports the historical hypothesis of anthropogenic diffusion of a zoonotic parasite Echinococcus multilocularis
Source: PubMed Central journal article supplement — iScience. 2023 Aug 26;26(10):107741. doi: 10.1016/j.isci.2023.107741 (PMC10507132; doi:10.1016/j.isci.2023.107741), 2023-08-26
Supplement: mmc1.pdf [file mmc1.pdf]

**Supplemental information**

**Mitogenomic exploration supports the historical  
hypothesis of anthropogenic diffusion  
of a zoonotic parasite *Echinococcus multilocularis***

**Naoki Hayashi, Ryo Nakao, Yuma Ohari, Takao Irie, Hirokazu Kouguchi, Elisha Chatanga, Wessam Mohamed Ahmed Mohamed, Mohamed Abdallah Mohamed Moustafa, Gohta Kinoshita, Munehiro Okamoto, Kinpei Yagi, and Nariaki Nonaka**

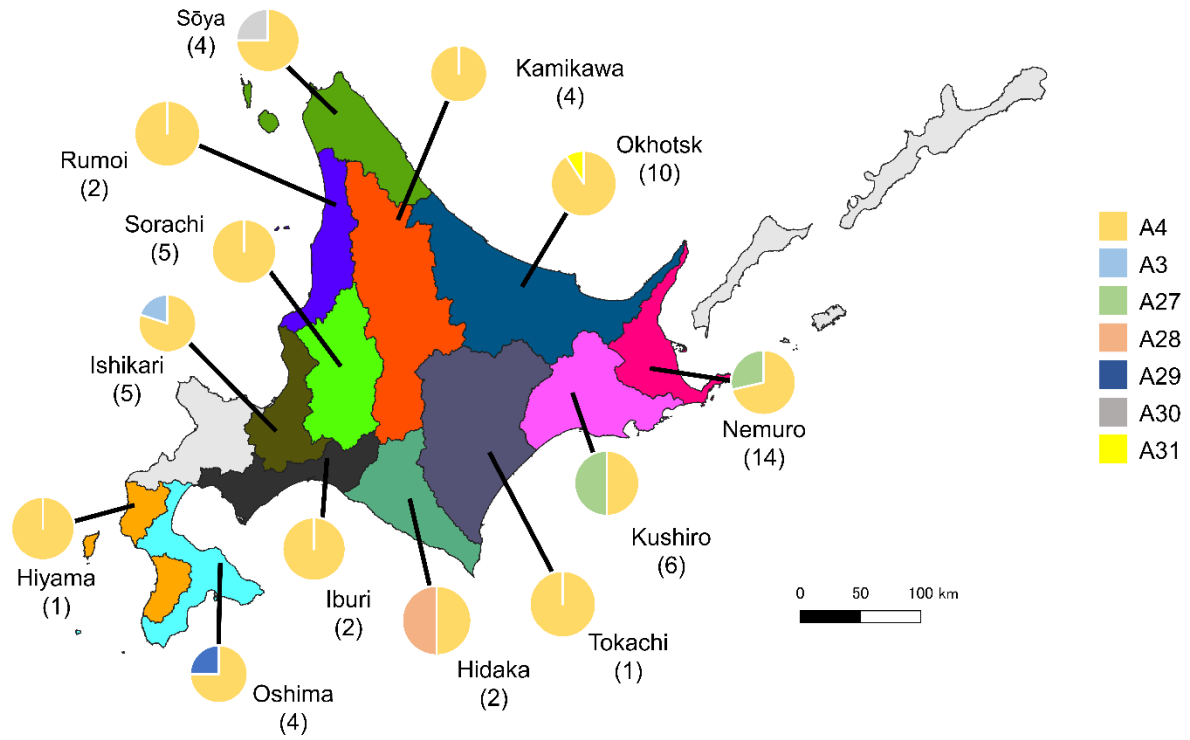

**Figure S1. Geographical mapping of detected haplotypes based on three mitochondrial protein coding sequences (CYTB/ND2/COI) of *Echinococcus multilocularis*, related to Table 1.** The numbers of parasites, distribution, and frequency of each haplotype on 13 subprefectures in Hokkaido are shown. The color of each pie chart corresponds to the haplotypes listed on the right.

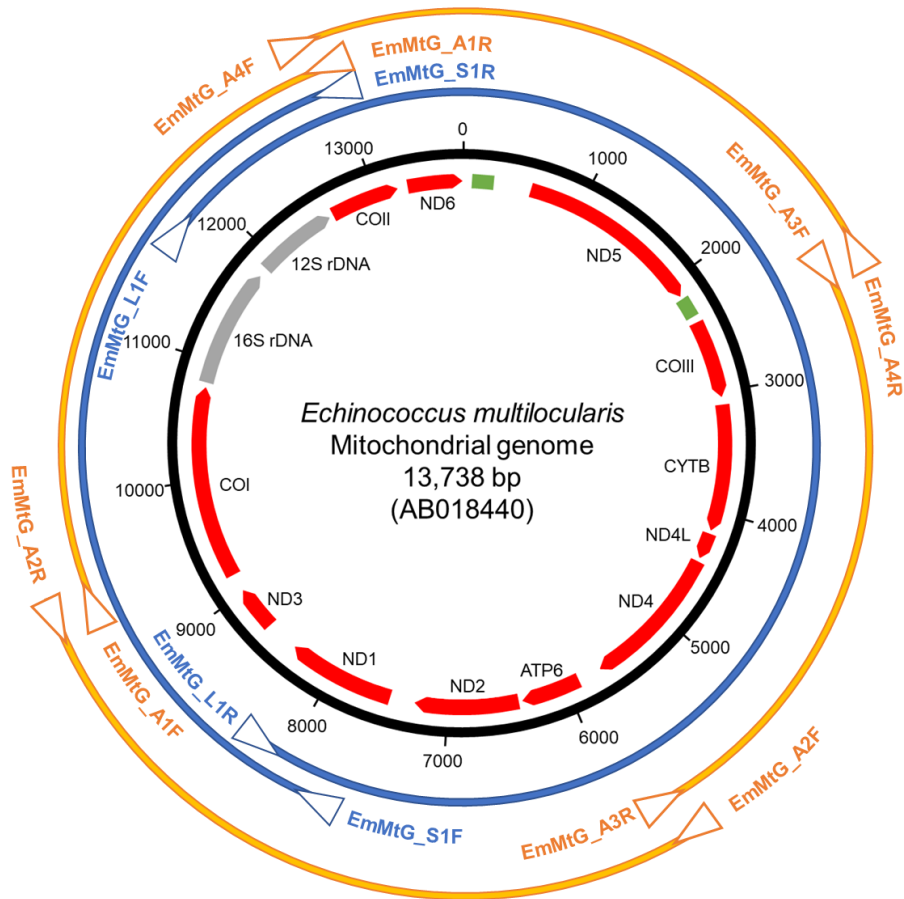

**Figure S2. PCR strategies for mitochondrial genome construction, related to STAR Methods.** The diagram of the mitochondrial genome of *E. multilocularis* (Accession no. AB014880) is illustrated with protein-coding sequences (red), ribosomal RNA (gray), and two major noncoding regions (green). Blue lines are two overlapping PCR fragments. Orange lines are four alternative PCR fragments. Arrowheads show each primer position.

**Table S2. Bayes factors (BFs) between two locations, related to Figure 4.**

| To<br>From                | Austria     | Belgium     | Canada      | Sichuan,<br>China | Estonia     | France      | Germany    | Hokkaido   | Inner<br>Mongolia | Kazakhstan  | Kyrgyzstan  | Poland      | Slovakia     | St.<br>Lawrence<br>Island | Indiana,<br>USA | Missouri,<br>USA | South<br>Dakota,<br>USA |
|---------------------------|-------------|-------------|-------------|-------------------|-------------|-------------|------------|------------|-------------------|-------------|-------------|-------------|--------------|---------------------------|-----------------|------------------|-------------------------|
| Austria                   |             | 0.903       | 0.842       | 0.838             | 0.903       | 0.884       | 1.92       | 0.760      | 0.866             | 0.813       | 0.832       | 0.887       | 0.862        | 0.831                     | 0.800           | 0.881            | 0.801                   |
| Belgium                   | 1.42        |             | 2.35        | 1.13              | 2.05        | 1.97        | 1.12       | 1.05       | 1.00              | 1.01        | 1.04        | 1.31        | 0.982        | 1.13                      | 1.05            | 3.33             | 0.983                   |
| Canada                    | 1.32        | 2.98        |             | 0.942             | 2.58        | 2.45        | 1.02       | 1.02       | 1.10              | 1.02        | 0.944       | 1.12        | 0.969        | 1.14                      | 0.957           | 3.00             | 0.990                   |
| Sichuan,<br>China         | 0.854       | 0.738       | 0.770       |                   | 0.827       | 0.860       | 0.696      | <b>731</b> | 1.45              | 0.792       | 1.35        | 2.97        | 0.646        | 1.62                      | 0.930           | 0.797            | 0.890                   |
| Estonia                   | 1.30        | 2.63        | 2.93        | 0.942             |             | 3.40        | 0.977      | 1.01       | 1.18              | 0.917       | 0.989       | 1.26        | 0.910        | 1.02                      | 0.992           | 2.84             | 0.961                   |
| France                    | <b>13.5</b> | <b>11.8</b> | 8.76        | 0.710             | 8.30        |             | <b>172</b> | 0.715      | 0.659             | 0.657       | 0.659       | 1.14        | 0.700        | 0.676                     | 0.676           | <b>13.3</b>      | 0.644                   |
| Germany                   | 3.59        | 1.39        | 1.22        | 1.29              | 1.16        | 1.34        |            | 1.23       | 1.31              | 1.21        | 1.21        | 1.36        | 1.19         | 1.33                      | 1.22            | 1.16             | 1.11                    |
| Hokkaido                  | 1.74        | 1.17        | 1.28        | 1.34              | 1.21        | 1.42        | 1.29       |            | 1.70              | 1.38        | 1.57        | 1.50        | 1.32         | 2.61                      | 1.35            | 1.33             | 1.48                    |
| Inner<br>Mongolia         | 1.35        | 1.05        | 1.09        | 1.43              | 1.05        | 1.14        | 1.03       | 1.01       |                   | 1.13        | 1.06        | 3.91        | 1.02         | 6.03                      | 1.31            | 1.20             | 1.27                    |
| Kazakhstan                | 1.71        | 1.39        | 1.43        | 1.38              | 1.37        | 1.59        | 1.24       | 1.37       | 1.43              |             | 1.26        | 1.68        | 1.28         | 1.52                      | 1.32            | 1.33             | 1.25                    |
| Kyrgyzstan                | 0.952       | 0.867       | 0.841       | 1.00              | 0.780       | 1.01        | 0.759      | 0.920      | 0.949             | <b>71.3</b> |             | 0.922       | 0.702        | 1.77                      | 0.804           | 0.764            | 0.922                   |
| Poland                    | <b>14.0</b> | 4.20        | <b>10.2</b> | <b>11.4</b>       | <b>10.5</b> | <b>22.5</b> | 0.965      | 0.751      | 4.23              | 0.819       | 2.54        |             | <b>14500</b> | 8.39                      | 2.05            | 4.43             | 2.58                    |
| Slovakia                  | 1.60        | 1.37        | 1.33        | 1.41              | 1.35        | 1.61        | 1.30       | 1.35       | 1.48              | 1.36        | 1.39        | 1.31        |              | 1.43                      | 1.54            | 1.35             | 1.39                    |
| St.<br>Lawrence<br>Island | 0.858       | 1.24        | 1.43        | <b>16.8</b>       | 1.79        | 2.56        | 0.670      | <b>216</b> | 9.43              | 3.95        | <b>68.5</b> | <b>19.1</b> | 0.657        |                           | <b>10.5</b>     | 1.13             | 9.22                    |
| Indiana,<br>USA           | 1.31        | 1.08        | 1.07        | 1.12              | 1.05        | 1.02        | 1.02       | 1.04       | 1.37              | 1.08        | 1.00        | 1.42        | 1.02         | 1.53                      |                 | 1.05             | <b>16.6</b>             |
| Missouri,<br>USA          | 1.62        | 4.74        | 2.30        | 1.18              | 2.29        | 2.21        | 1.17       | 1.19       | 1.18              | 1.21        | 1.19        | 1.38        | 1.23         | 1.19                      | 1.26            |                  | 1.22                    |
| South<br>Dakota,<br>USA   | 1.48        | 1.01        | 1.07        | 0.970             | 1.06        | 1.05        | 1.08       | 1.03       | 1.28              | 1.00        | 1.12        | 1.38        | 1.06         | 1.51                      | <b>16.4</b>     | 1.07             |                         |

BFs with a value >10 are highlighted in bold font (values >100 are highlighted in bold red font).

**Table S3. Primer sequences and PCR product sizes, related to STAR Methods.**

| Primer name | Primer sequence (5'→3')        | Product size (bp) |
|-------------|--------------------------------|-------------------|
| EmMtG_S1F   | CGTAAGGGTCCTAAYAAGGTTGG        | 5,469             |
| EmMtG_S1R   | GATTAAGACGACCMGGRAYAGCATCC     |                   |
| EmMtG_L1F   | CCAGGTCGGTTCTTATCTATTGTRGAAG   | 10,436            |
| EmMtG_L1R   | CCATTTCTTGAAGTTAACAGCATCACG    |                   |
| EmMtG_A1F   | TGCCACGTTTGAATGCTTTGAGTGCGTG   | 3,614             |
| EmMtG_A1R   | GATTAAGACGACCCGGAATAGCATCC     |                   |
| EmMtG_A2F   | GGGATAACTTATGTTAGGGAGACTGG     | 3,864             |
| EmMtG_A2R   | CTCTAGAAACACCTGCTAAATGCAAAG    |                   |
| EmMtG_A3F   | GGCGATATAGATATGTCTGTGGTTCC     | 3,531             |
| EmMtG_A3R   | CATAAACCCGACCTATTAAGAACC       |                   |
| EmMtG_A4F   | GGCGGTTGAGTTGATATGAACTATAGTTCC | 3,447             |
| EmMtG_A4R   | AATAACCCAACCAAACCTAAGCCAAC     |                   |

**Table S4. Accession numbers and references of sequences used in this study, related to STAR Methods.**

| Haplotype | Location                                                 | CYTB     | ND2      | COI      | Reference no.          | Remarks                                                  |
|-----------|----------------------------------------------------------|----------|----------|----------|------------------------|----------------------------------------------------------|
| A1        | Kazakhstan (1)                                           | AB461398 | AB461406 | AB461415 | [S1]                   |                                                          |
| A2        | St. Lawrence Island (1), Kyrgyzstan (48), Kazakhstan (4) | AB461398 | AB461406 | AB461416 | [S1], [S2], This study |                                                          |
| A3        | Hokkaido (2)                                             | AB461399 | AB461407 | AB461416 | [S1], This study       |                                                          |
| A4        | Hokkaido (49), St Lawrence Island (2)                    | AB461398 | AB461407 | AB461416 | [S1], This study       |                                                          |
| A5        | Sichuan (17)                                             | AB461398 | AB461408 | AB461417 | [S1]                   |                                                          |
| A6        | Sichuan (1)                                              | AB461398 | AB461408 | AB477011 | [S1]                   |                                                          |
| A7        | Sichuan (1)                                              | AB461398 | AB461408 | AB477012 | [S1]                   |                                                          |
| A8        | Sichuan (1)                                              | AB477009 | AB461408 | AB477010 | [S1]                   |                                                          |
| A9        | Sichuan (1)                                              | AB461398 | AB461408 | AB461416 | [S1]                   |                                                          |
| A10       | Sichuan (1)                                              | AB461398 | AB461406 | AB461417 | [S1]                   |                                                          |
| A11       | Kyrgyzstan (4)                                           | MN829497 | MN829513 | MN829529 | [S2]                   |                                                          |
| A12       | Kyrgyzstan (3)                                           | MN829498 | MN829514 | MN829530 | [S2]                   |                                                          |
| A13       | Kyrgyzstan (2)                                           | MN829499 | MN829515 | MN829531 | [S2]                   |                                                          |
| A14       | Kyrgyzstan (2)                                           | MN829500 | MN829516 | MN829532 | [S2]                   |                                                          |
| A15       | Kyrgyzstan (2)                                           | MN829501 | MN829517 | MN829533 | [S2]                   |                                                          |
| A16       | Kyrgyzstan (2)                                           | MN829502 | MN829518 | MN829534 | [S2]                   |                                                          |
| A17       | Kyrgyzstan (2)                                           | MN829503 | MN829519 | MN829535 | [S2]                   |                                                          |
| A18       | Kyrgyzstan (1)                                           | MN829504 | MN829520 | MN829536 | [S2]                   |                                                          |
| A19       | Kyrgyzstan (1)                                           | MN829505 | MN829521 | MN829537 | [S2]                   |                                                          |
| A20       | Kyrgyzstan (1)                                           | MN829506 | MN829522 | MN829538 | [S2]                   |                                                          |
| A21       | Kyrgyzstan (1)                                           | MN829507 | MN829523 | MN829539 | [S2]                   |                                                          |
| A22       | Kyrgyzstan (1)                                           | MN829508 | MN829524 | MN829540 | [S2]                   |                                                          |
| A23       | Kyrgyzstan (1)                                           | MN829509 | MN829525 | MN829541 | [S2]                   |                                                          |
| A24       | Kyrgyzstan (1)                                           | MN829510 | MN829526 | MN829542 | [S2]                   |                                                          |
| A25       | Kyrgyzstan (1)                                           | MN829511 | MN829527 | MN829543 | [S2]                   |                                                          |
| A26       | Kyrgyzstan (1)                                           | MN829512 | MN829528 | MN829544 | [S2]                   | Excluded from analysis due to nucleotide deletion in COI |
| A27       | Hokkaido (7)                                             | LC720729 | LC720729 | LC720729 | This study             |                                                          |
| A28       | Hokkaido (1)                                             | LC720772 | LC720772 | LC720772 | This study             |                                                          |
| A29       | Hokkaido (1)                                             | LC720778 | LC720778 | LC720778 | This study             |                                                          |
| A30       | Hokkaido (1)                                             | LC720763 | LC720763 | LC720763 | This study             |                                                          |
| A31       | Hokkaido (1)                                             | LC720780 | LC720780 | LC720780 | This study             |                                                          |

|        |                                       |          |          |          |                  |
|--------|---------------------------------------|----------|----------|----------|------------------|
| E1     | Austria (1)                           | AB461395 | AB461403 | AB461412 | [S1]             |
| E2     | France (4), Germany (1)               | AB461395 | AB461403 | AB461414 | [S1]             |
| E3     | France (1)                            | AB461396 | AB461404 | AB461413 | [S1]             |
| E4     | France (5), Belgium (2), Missouri (1) | AB461395 | AB461404 | AB461414 | [S1], [S4]       |
| E5     | Slovakia (10)                         | AB461397 | AB461405 | AB461414 | [S1]             |
| N1     | St. Lawrence Island (9)               | AB461400 | AB461409 | AB461418 | [S1], This study |
| N2     | Indiana (5), South Dakota (1)         | AB461401 | AB461410 | AB461419 | [S1]             |
| O1     | Inner Mongolia (2)                    | AB461402 | AB461411 | AB461420 | [S1]             |
| EmPL1  | Poland (29)                           | KY205662 | KY205692 | KY205677 | [S3]             |
| EmPL2  | Poland (1)                            | KY205663 | KY205693 | KY205678 | [S3]             |
| EmPL3  | Poland (4)                            | KY205664 | KY205694 | KY205679 | [S3]             |
| EmPL4  | Poland (14)                           | KY205665 | KY205695 | KY205680 | [S3]             |
| EmPL5  | Poland (1)                            | KY205666 | KY205696 | KY205681 | [S3]             |
| EmPL6  | Poland (1)                            | KY205667 | KY205697 | KY205682 | [S3]             |
| EmPL7  | Poland (1)                            | KY205668 | KY205698 | KY205683 | [S3]             |
| EmPL8  | Poland (1)                            | KY205669 | KY205699 | KY205684 | [S3]             |
| EmPL9  | Poland (7)                            | KY205670 | KY205700 | KY205685 | [S3]             |
| EmPL10 | Poland (4)                            | KY205671 | KY205701 | KY205686 | [S3]             |
| EmPL11 | Poland (1)                            | KY205672 | KY205702 | KY205687 | [S3]             |
| EmPL12 | Poland (4)                            | KY205673 | KY205703 | KY205688 | [S3]             |
| EmPL13 | Poland (2)                            | KY205674 | KY205704 | KY205689 | [S3]             |
| EmPL14 | Poland (3)                            | KY205675 | KY205705 | KY205690 | [S3]             |
| EmPL15 | Poland (3)                            | KY205676 | KY205706 | KY205691 | [S3]             |
| EST1   | Estonia (1)                           | KT001421 | KT001425 | KT001423 | [S5]             |
| EST2   | Estonia (1)                           | KT001422 | KT001426 | KT001424 | [S5]             |
| EAB    | Canada (4)                            | MK843307 | AB461404 | MK843308 | [S6]             |
| ECA    | Canada (66)                           | MK843307 | AB461404 | AB461414 | [S6]             |
| ESK    | Canada (7)                            | MK843307 | AB461404 | MK843309 | [S6]             |

Sequences of EmPL2 are same to those of EmPL4

Numbers enclosed within brackets in the 'Location' column indicate the count of detected haplotypes.

## References

- [S1] Nakao, M., Xiao, N., Okamoto, M., Yanagida, T., Sako, Y., and Ito, A. (2009). Geographic pattern of genetic variation in the fox tapeworm *Echinococcus multilocularis*. *Parasitol. Int.* *58*, 384–389. 10.1016/j.parint.2009.07.010.
- [S2] Alvarez Rojas, C.A., Kronenberg, P.A., Aitbaev, S., Omorov, R.A., Abdykerimov, K.K., Paternoster, G., Müllhaupt, B., Torgerson, P., and Deplazes, P. (2020). Genetic diversity of *Echinococcus multilocularis* and *Echinococcus granulosus sensu lato* in Kyrgyzstan: The A2 haplotype of *E. multilocularis* is the predominant variant infecting humans. *PLoS Negl. Trop. Dis.* *14*, 1–15. 10.1371/journal.pntd.0008242.
- [S3] Karamon, J., Stojecki, K., Samorek-Pieróg, M., Bilaska-Zajac, E., Rózycki, M., Chmurzynska, E., Sroka, J., Zdybel, J., and Cencek, T. (2017). Genetic diversity of *Echinococcus multilocularis* in red foxes in Poland: The first report of a haplotype of probable Asian origin. *Folia Parasitol. (Praha)* *64*. 10.14411/fp.2017.007.
- [S4] Kuroki, K., Morishima, Y., Neil, J., Beerntsen, B.T., Matsumoto, J., and Stich, R.W. (2020). Intestinal echinococcosis in a dog from Missouri. *J. Am. Vet. Med. Assoc.* *256*, 1041–1046. 10.2460/javma.256.9.1041.
- [S5] Laurimaa, L., Süld, K., Moks, E., Valdmann, H., Umhang, G., Knapp, J., and Saarma, U. (2015). First report of the zoonotic tapeworm *Echinococcus multilocularis* in raccoon dogs in Estonia, and comparisons with other countries in Europe. *Vet. Parasitol.* *212*, 200–205. 10.1016/j.vetpar.2015.06.004.
- [S6] Massolo, A., Klein, C., Kowalewska-Grochowska, K., Belga, S., MacDonald, C., Vaughan, S., Girgis, S., Giunchi, D., Bramer, S.A., Santa, M.A., et al. (2019). European *Echinococcus multilocularis* identified in patients in Canada. *N. Engl. J. Med.* *381*, 384–385. 10.1056/nejmc1814975.
